# Supplementary material
Source: PubMed Central journal article supplement (PMC3398570)
Supplement: supp_tpc.112.096768_tpc096768SupplementalData.pdf [file supp_tpc.112.096768_tpc096768SupplementalData.pdf]

Supplemental Figure 1

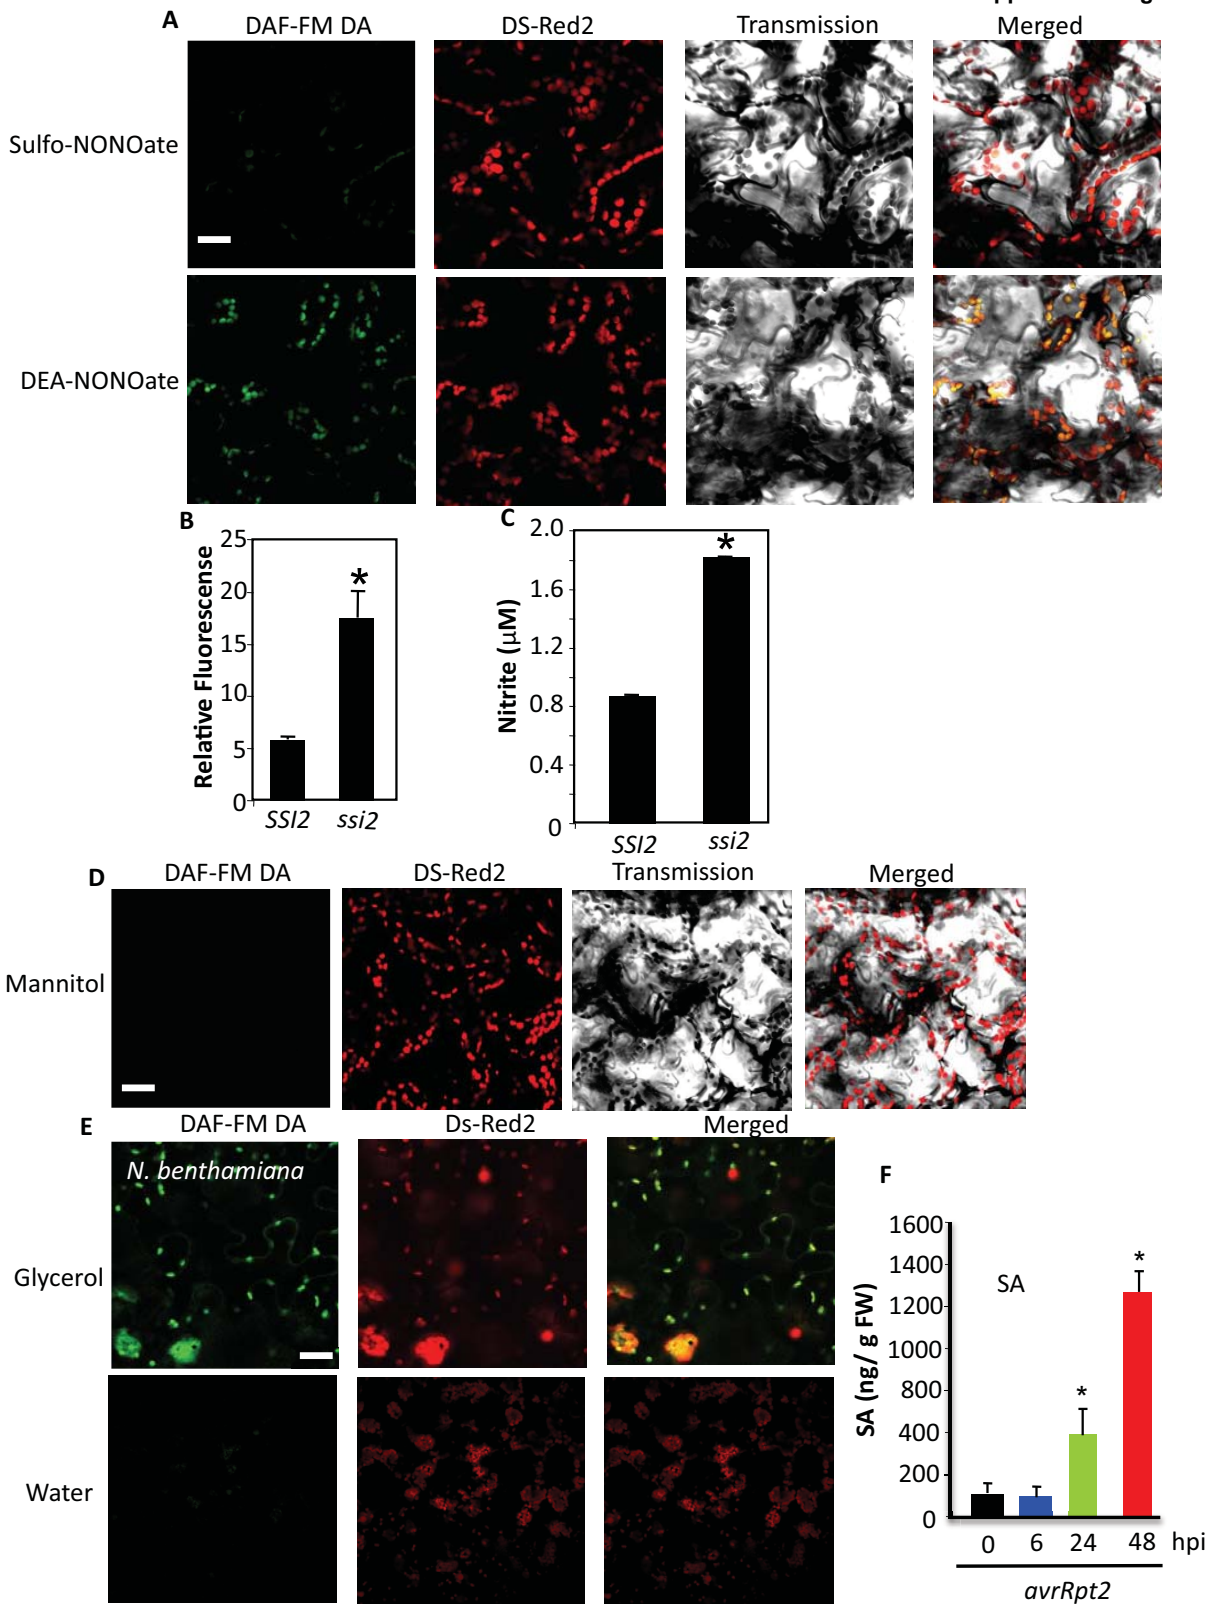

**Supplemental Figure 1. The *ssi2* plants accumulate high levels of chloroplastic NO.** (A) Confocal micrograph of DAF-FM DA stained leaves showing induction of NO in wild-type (Col-0) plants treated with 0.1 mM NO donor DEA-NONOate. Control plants were treated with 0.1 mM sulfo-NONOate and plants were analyzed 24 h post treatment. Scale bar, 20  $\mu$ m. Chloroplast autofluorescence (red) was visualized using Ds-Red2 channel. At least four independent leaves were analyzed in two experiments with similar results. (B) Relative fluorescence in DAF-FM DA treated plants quantified using a fluorimeter. The error bars indicate SD (n=4). Asterisks denote a significant difference with wild-type Nössen (*SSI2*) (*t* test,  $P < 0.05$ ). DAF-FM fluorescence was quantified from tissue extracts prepared as described in the method section. (C) Levels of nitrite in the soil grown four-week-old plants. The nitrate levels were estimated using Griess assay. The error bars represent SD (n=4). Asterisks denote a significant difference with wild-type (*t* test,  $P < 0.05$ ). The experiment was carried out twice with similar results. (D) Confocal micrograph of DAF-FM DA stained Col-0 leaves 24 h post treatment with 50 mM mannitol. Scale bar, 20  $\mu$ m. At least six independent leaves were analyzed in two experiments with similar results. Chloroplast autofluorescence (red) was visualized using Ds-Red2 channel. (E) Confocal micrograph of DAF-FM DA stained leaves showing subcellular location of NO in glycerol-treated *Nicotiana benthamiana* plants. Scale bar, 20  $\mu$ m. Plants were treated with water or 50 mM glycerol and analyzed 24 h post treatments. At least four independent leaves were analyzed in two experiments with similar results. (F) A time course showing SA levels in pathogen inoculated plants wild-type Col-0 plants. Plants were inoculated with *avrRpt2 Pseudomonas syringae* and SA was measured from the inoculated leaves at indicated hours post inoculation (hpi). The error bars indicate SD (n=4). Asterisks denote a significant difference (*t* test,  $P < 0.05$ ).

Supplemental Figure 2

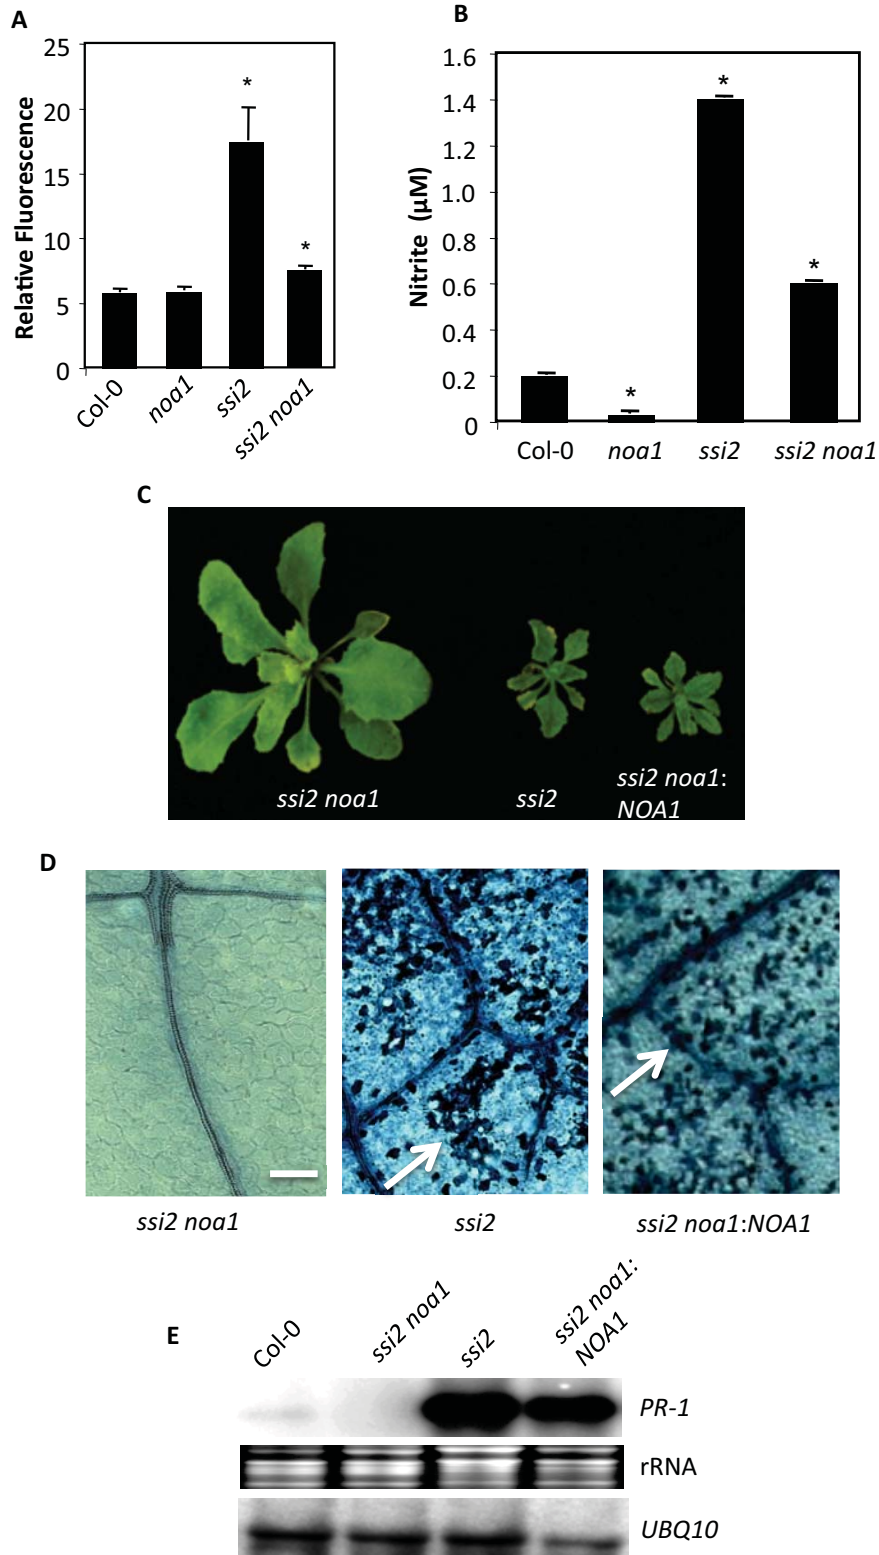

**Supplemental Figure 2. Transgenic expression of *NOA1* restores *ssi2*-like phenotypes in *ssi2 noa1* plants.** (A) Relative fluorescence in DAF-FM DA treated plants quantified using a fluorimeter. The error bars indicate SD (n=4). Asterisks denote a significant difference with wild-type Col-0 (*t* test, P<0.05). DAF-FM fluorescence was quantified from tissue extracts prepared as described in the method section. (B) Levels of nitrite in the soil grown four-week-old plants. The nitrate levels were estimated using Griess assay. The error bars represent SD (n=4). Asterisks denote a significant difference with wild-type (*t* test, P<0.05). (C) Morphological phenotype of four-week-old soil grown plants. (D) Microscopy of trypan blue stained leaves. Scale bars, 270 microns. Arrows indicate dead cells. At least six independent leaves were analyzed in two experiments with similar results. (E) RNA gel blot showing transcript levels of *PR-1* gene. Ubiquitin mRNA (*UBQ10*) and ethidium bromide staining of rRNA were used as loading controls. Four independent *ssi2 noa1* T2 plants containing the *NOA1* transgene were analyzed and all showed *ssi2*-like levels of *PR-1* gene.

Supplemental Figure 3

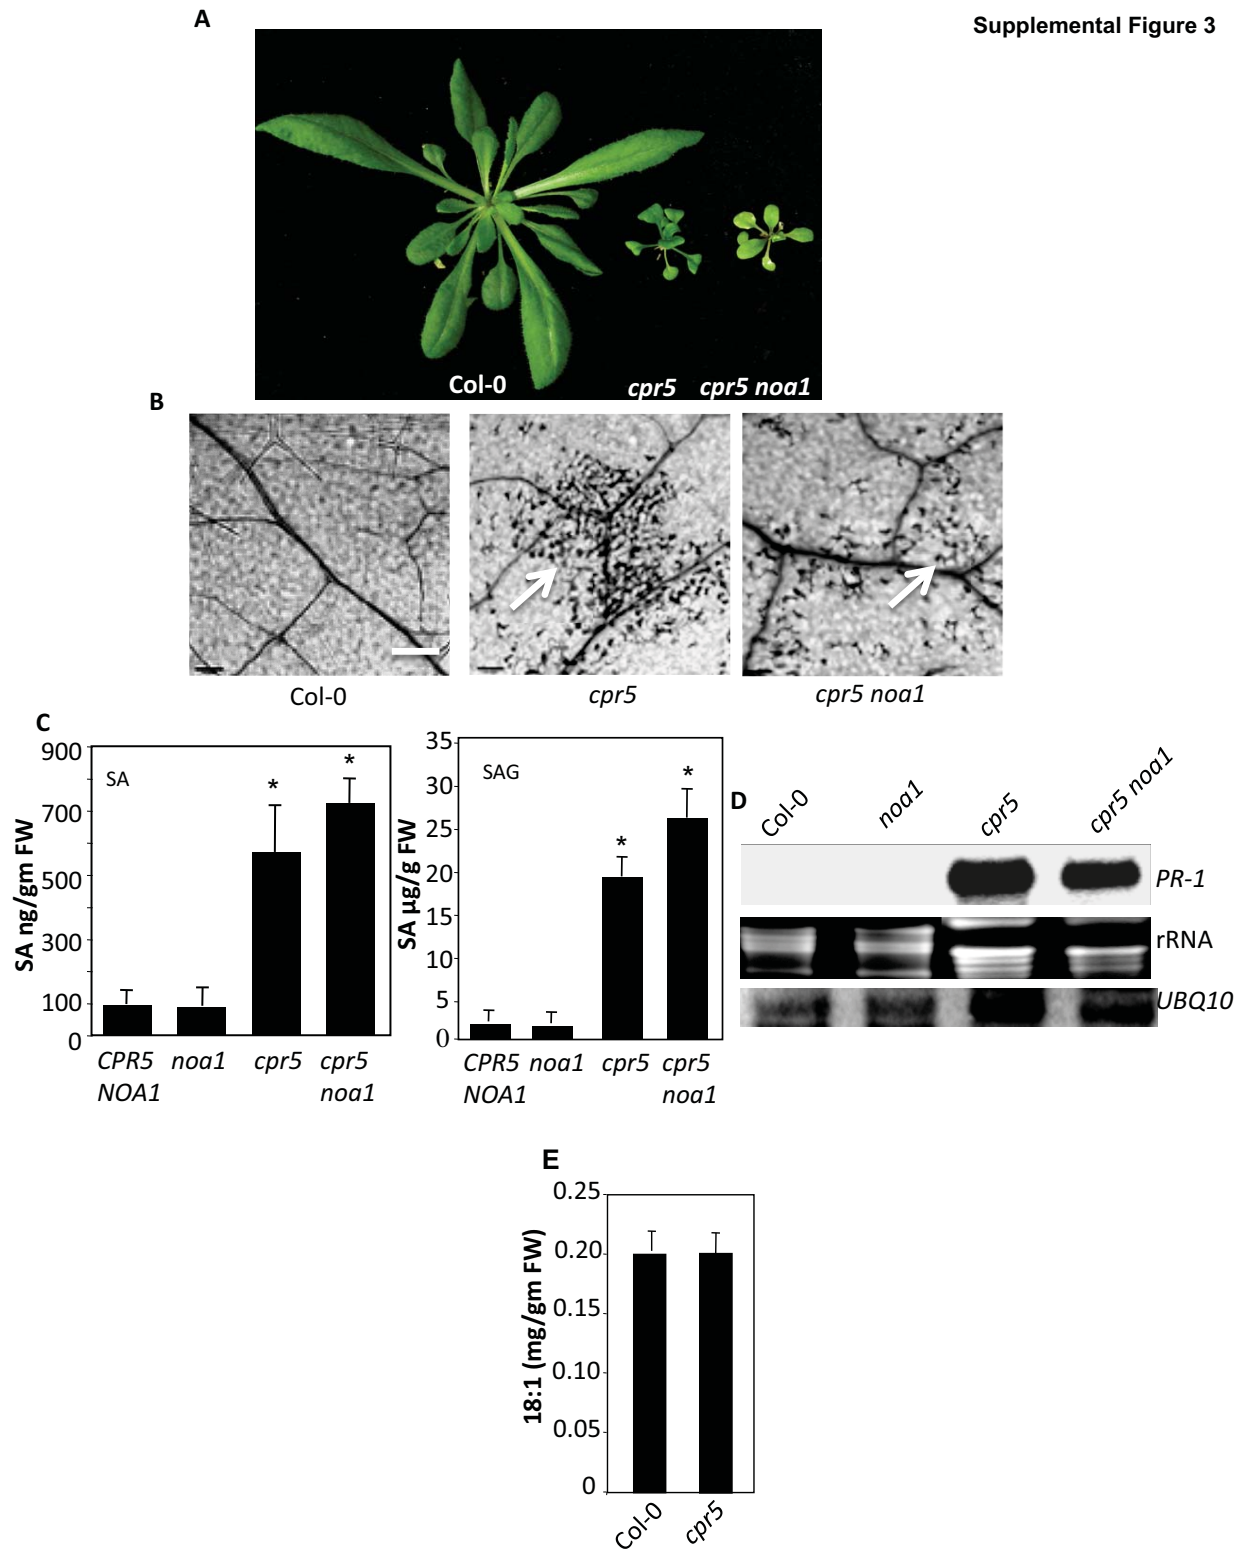

**Supplemental Figure 3. A mutation in *NOA1* does not restore constitutive defense phenotypes in *cpr5* plants.** (A) Morphological phenotype of four-week-old plants. (B) Microscopy of trypan blue stained leaves. Scale bars, 270 microns. Arrows indicate dead cells. At least four independent leaves of all genotypes were analyzed in two experiments with similar results. (C) SA and SAG levels in indicated genotypes. The error bars represent SD (n=3). Asterisks denote a significant difference with wild-type (*t* test,  $P < 0.05$ ). The experiment was repeated twice with similar results. (D) RNA gel blot showing transcript levels of *PR-1* gene. Ubiquitin mRNA (*UBQ10*) and ethidium bromide staining of rRNA were used as loading controls. The experiment was repeated twice with similar results. (E) 18:1 levels in wild-type Col-0 and *cpr5* plants. The error bars represent SD (n=6).

## Supplemental Figure 4

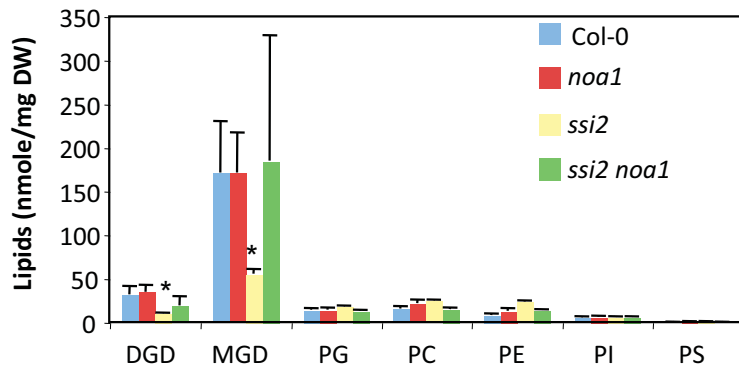

**Supplemental Figure 4. Profile of total lipids extracted from wild-type (Col-0), *noa1*, *ssi2* and *ssi2 noa1* plants.** The values are presented as an average of 5 replicates. The error bars represent SD (n=5). Asterisks denote a significant difference with wild-type (*t* test,  $P < 0.05$ ). Symbols for various components are: DGD, digalactosyldiacylglycerol; MGD, monogalactosyldiacylglycerol; PG, phosphatidylglycerol; PC, phosphatidylcholine; PE, phosphatidylethaloamine; PI, phosphatidylinositol; PS, phosphatidylserine.



Supplemental Figure 5

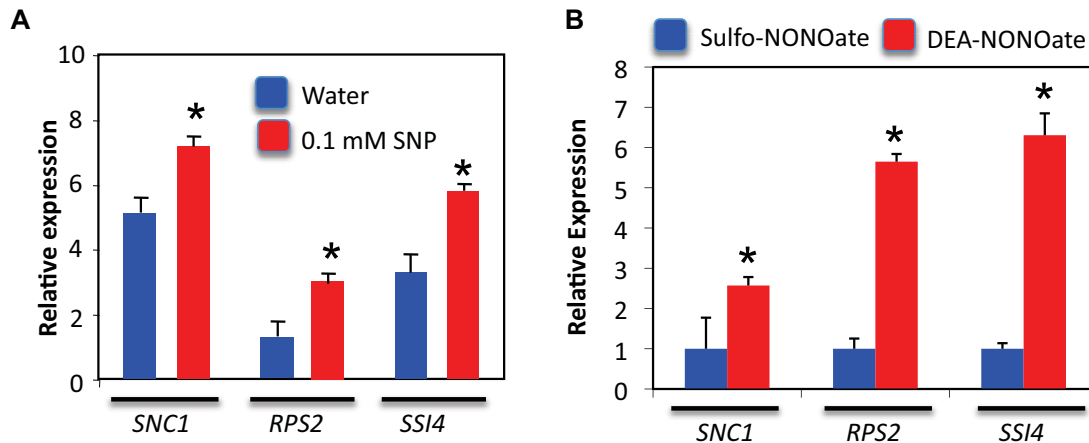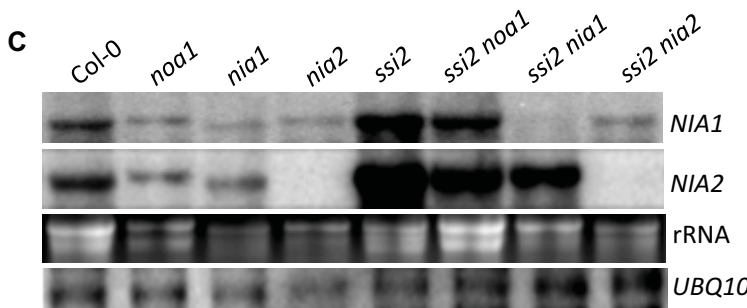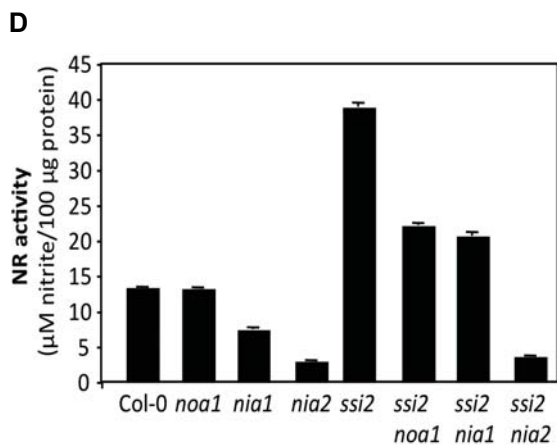

**Supplemental Figure 5. Expression of *R* and the *NIA1/NIA2* genes is induced by NO and low 18:1 conditions, respectively. (A and B)** Quantitative RT-PCR analysis showing relative levels of *SNC1*, *RPS2* and *SSI4* genes in wild-type Col-0 plants treated with 0.1 mM SNP (A) or 0.1 mM DEA-NONOate (B). Leaves were sampled 12 h post treatments. The error bars indicate SD (n=3). Asterisks denote a significant difference with wild-type (*t* test,  $P < 0.05$ ). The error bars represent SD. (C) RNA gel blot showing transcript levels of *NIA1* and *NIA2* genes in indicated genotypes. Ubiquitin mRNA (*UBQ10*) and ethidium bromide staining of rRNA were used as loading controls. This experiment was repeated twice with similar results. (D) Nitrate reductase activity in indicated genotypes. This experiment was repeated twice with similar results.



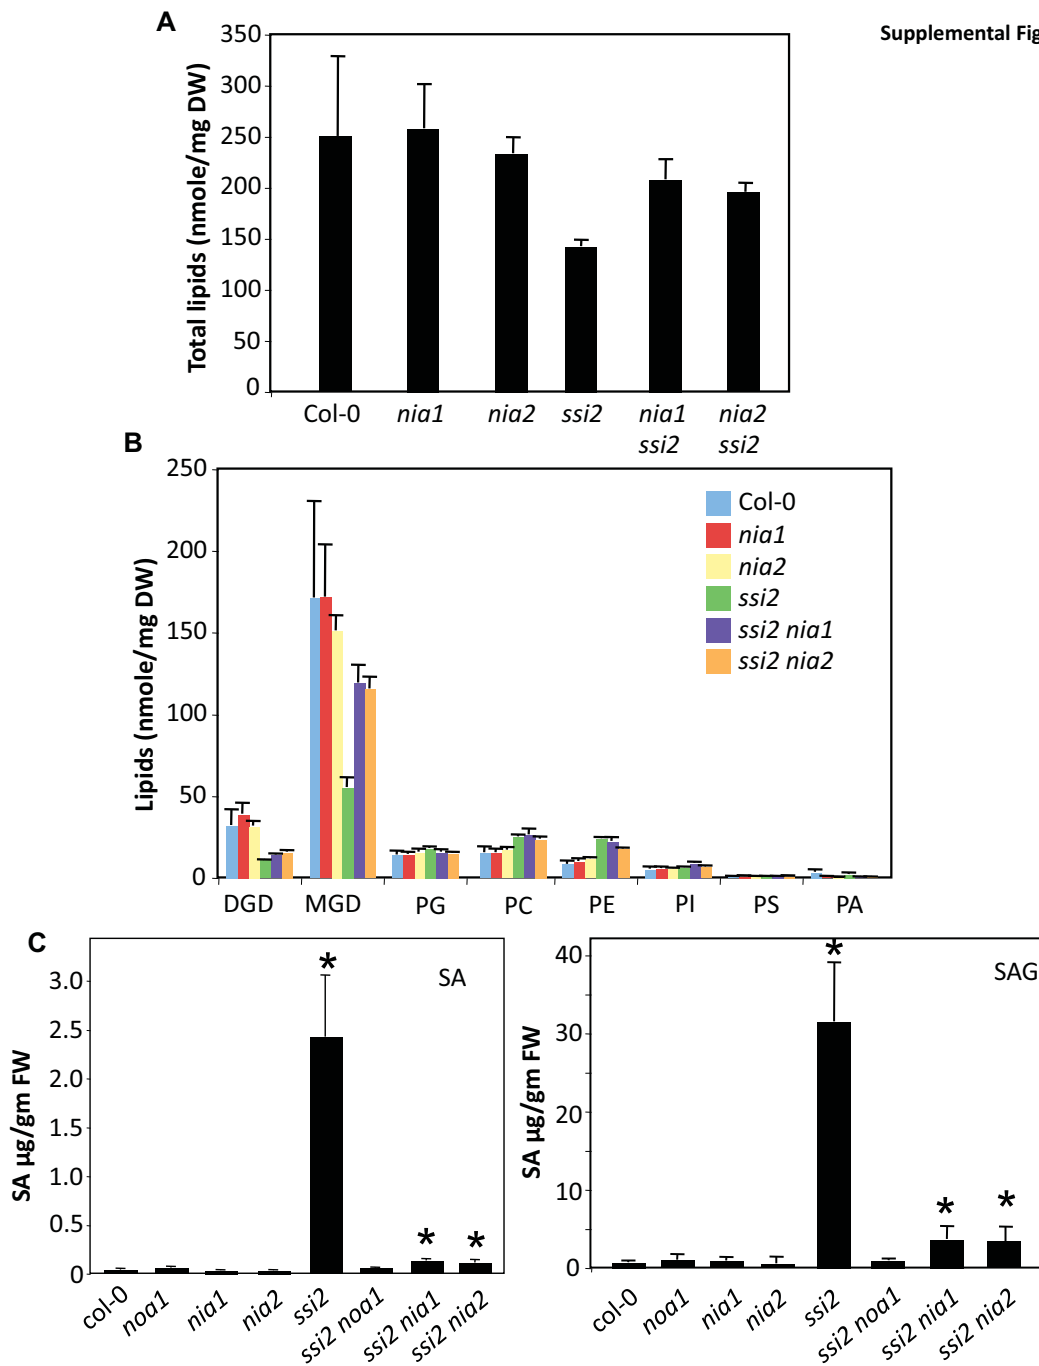

**Supplemental Figure 6. Mutations in *NIA1* and *NIA2* partially restore *ssi2* phenotypes.** (A) Total lipid levels in indicated genotypes. DW indicates dry weight. The error bars represent SD (n=5). (B) Profile of total lipids extracted from wild-type (Col-0), *nia1*, *nia2*, *ssi2*, *ssi2 nia1* and *ssi2 nia2* plants. The values are presented as an average of 5 replicates. The error bars represent SD (n=5). (C) SA and SAG levels in indicated genotypes. The error bars represent SD (n=3). Asterisks denote a significant difference with wild-type (*t* test,  $P < 0.05$ ).

Supplemental Figure 7

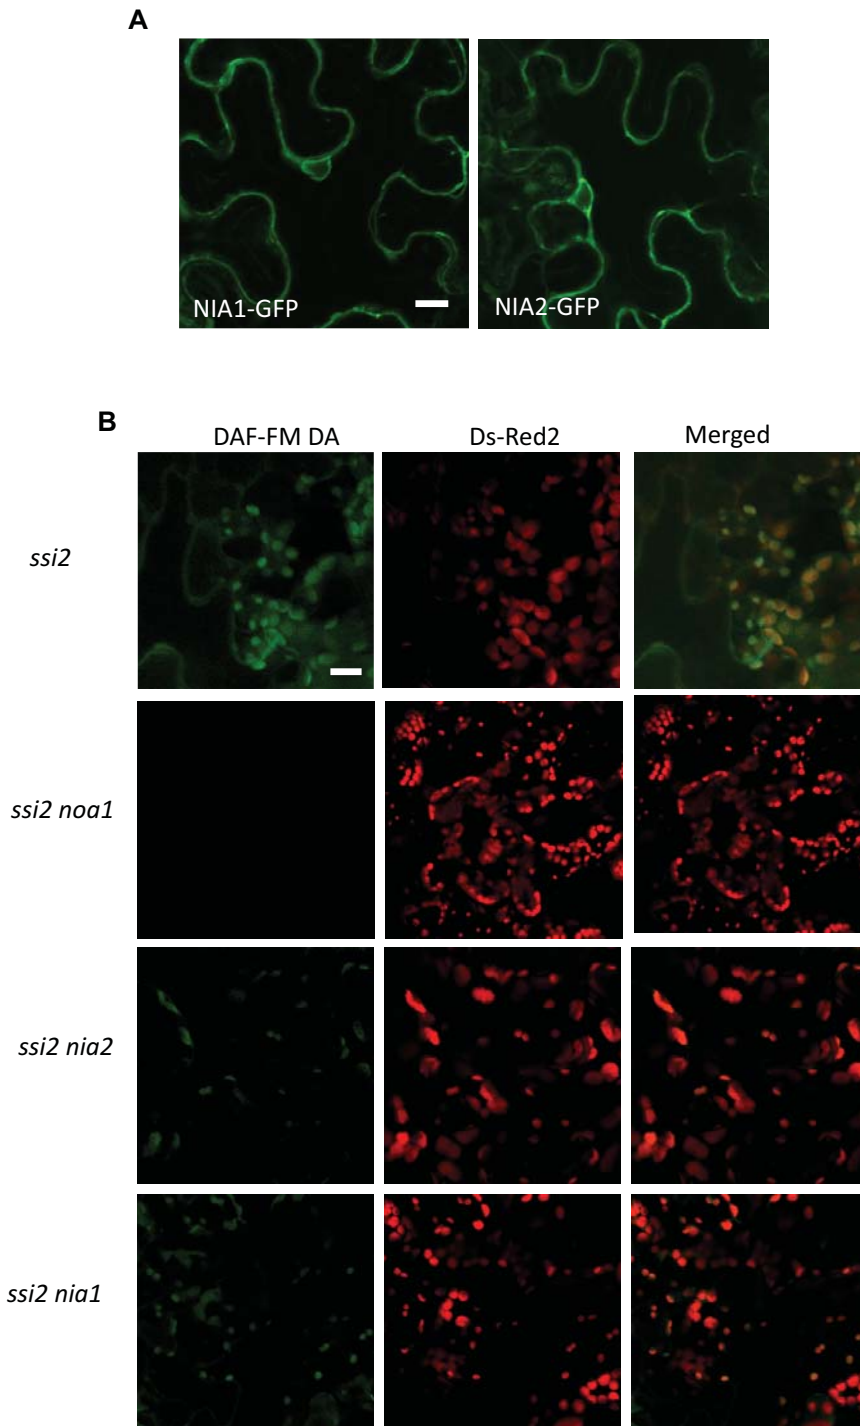

**Supplemental Figure 7. NIA1 and NIA2 are extrachloroplastic proteins required for chloroplastic NO accumulation in *ssi2* plants.**

(A) Confocal micrograph showing localization of NIA1-GFP and NIA2-GFP protein in *N. benthamiana*. Scale bar, 5  $\mu$ m. (B) Confocal micrograph of DAF-FM DA stained leaves showing subcellular location of NO in indicated genotypes. Chloroplast autofluorescence (red) was visualized using Ds-Red2 channel. Scale bar, 10  $\mu$ m. At least six independent leaves were analyzed in two experiments with similar results.

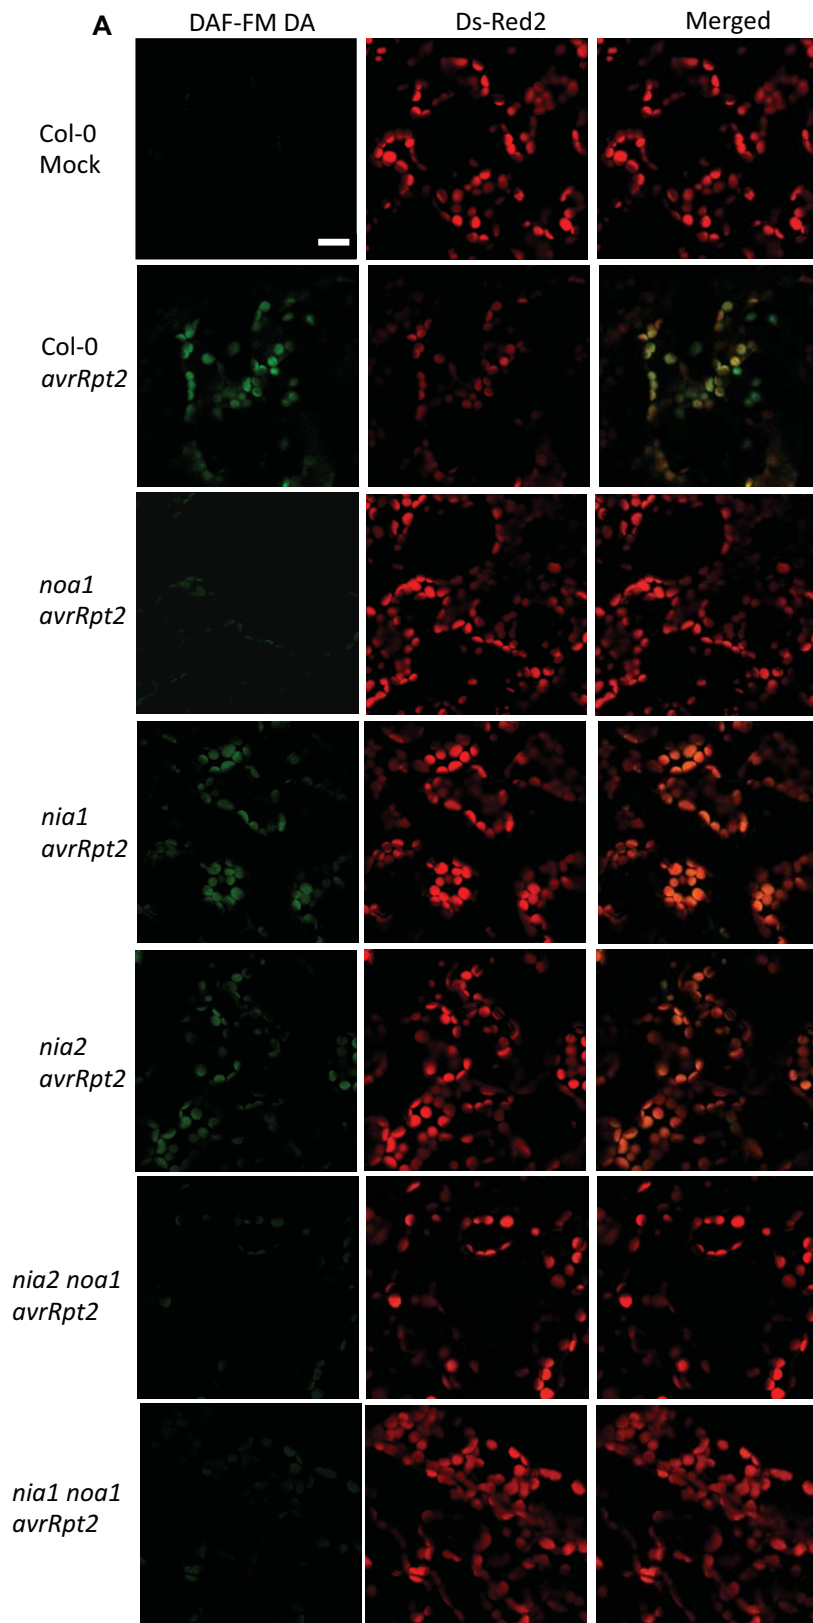

Supplemental Figure 8

## Supplemental Figure 8

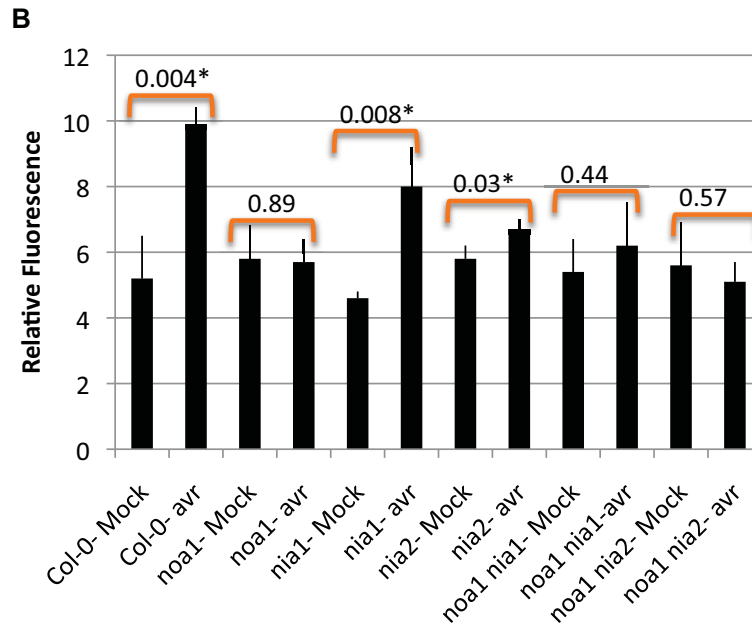

**Supplemental Figure 8. The *noa1 nia* plants are compromised in pathogen induced NO accumulation.** (A) Confocal micrograph showing pathogen-induced NO accumulation in indicated genotypes. Plants were inoculated with  $MgCl_2$  (mock) or *avrRpt2* expressing *P. syringae*. Scale bar, 10  $\mu m$ . At least four independent leaves were analyzed in two experiments with similar results. Chloroplast autofluorescence (red) was visualized using Ds-Red2 channel. (B) Relative fluorescence in  $MgCl_2$  or pathogen inoculated leaves quantified using a fluorimeter. The error bars represent SD (n=3). Numbers above the bars indicate P value and asterisks denote a significant difference with mock-inoculated plants (*t* test).

Supplemental Figure 9

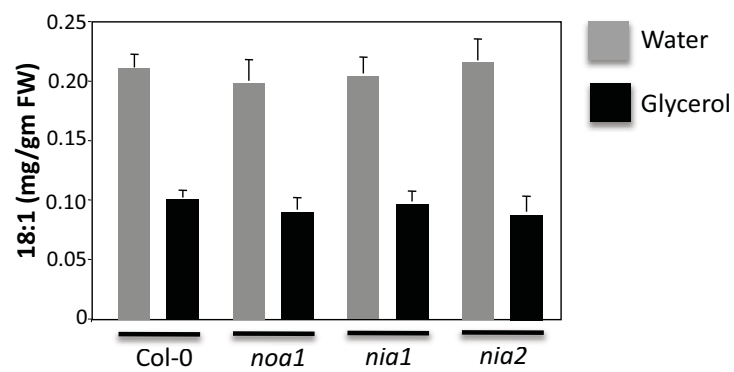

**Supplemental Figure 9. The glycerol-treated Col-0, noa1, nia1 and nia2 plants show similar decrease in their 18:1 levels.** 18:1 levels in water and glycerol treated plants. Error bars represent SD (n=6).

Supplemental Figure 10

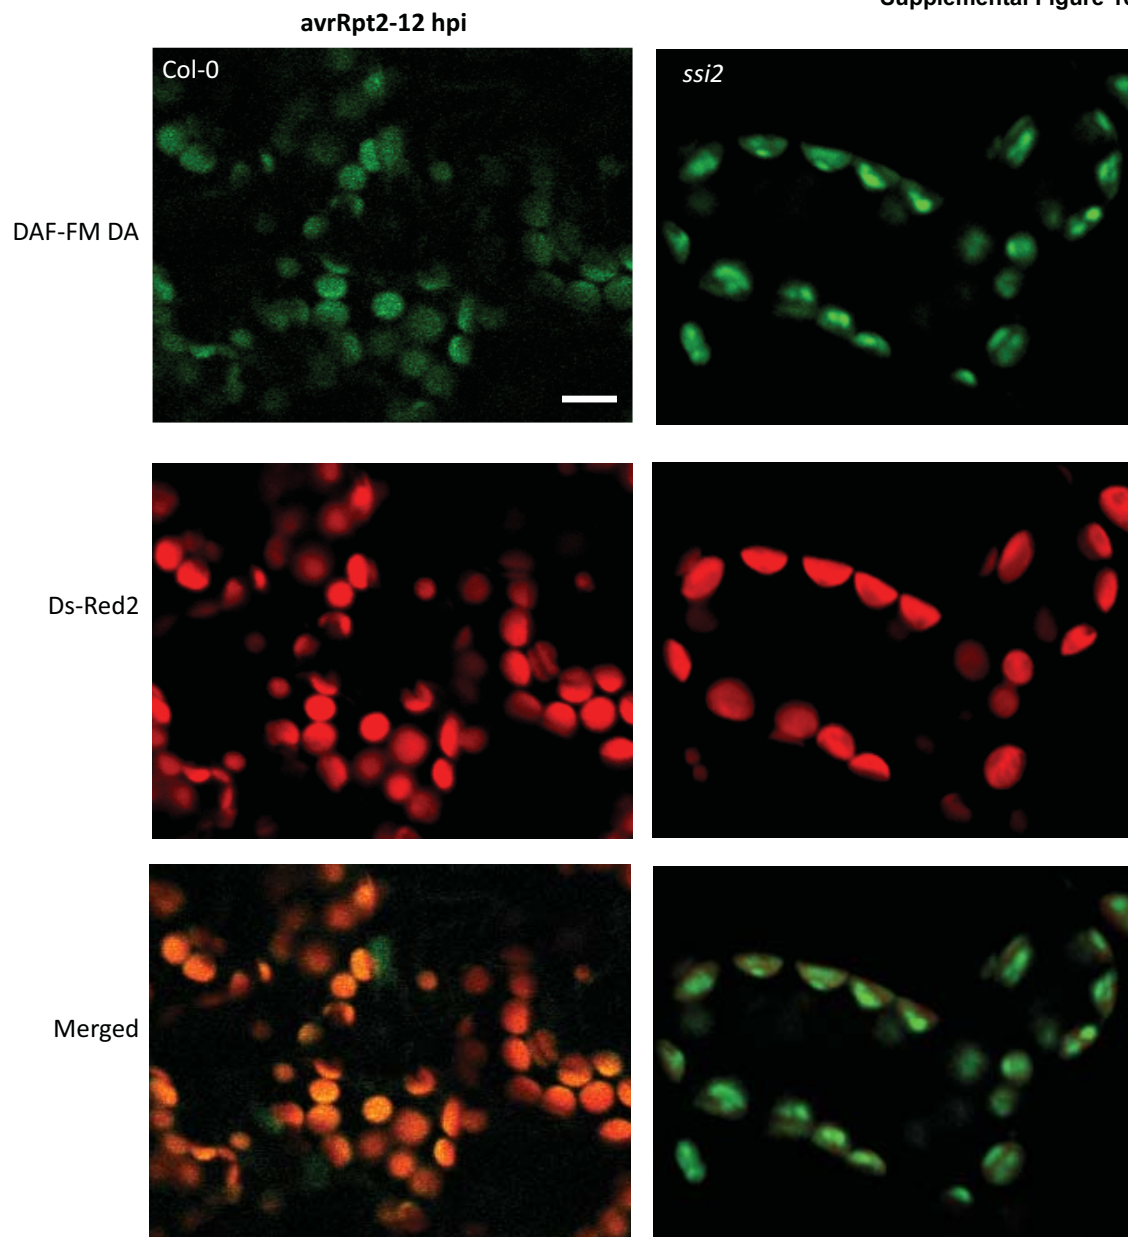

**Supplemental Figure 10. Subcellular localization of NO in *ssi2* and *avrRpt2* inoculated wild-type plants.** Confocal micrograph of DAF-FM DA stained *ssi2* and *avrRpt2* inoculated wild-type (*Col-0*) plants. Scale bar, 5  $\mu$ m. At least eight independent leaves were analyzed in three experiments with similar results. Chloroplast autofluorescence (red) was visualized using Ds-Red2 channel.

Supplemental Figure 11

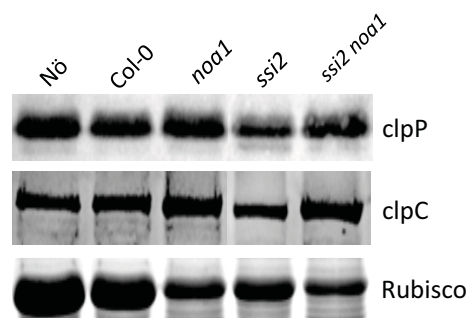

**Supplemental Figure 11. Levels of clpC and clpP in *ssi2* plants.** Western blot showing levels of clpC, clpP levels in wild-type (*SSI2*), *noa1*, *ssi2* and *ssi2 noa1* plants. Ponceau-S staining of the Western blot was used as the loading control. The experiment was repeated twice with similar results.



## Supplemental Figure 12

**A**

|       |                        |                      |
|-------|------------------------|----------------------|
| FABP1 | NFEAFMKAIG-LPEFTVGEECE | IITNTMTLGDIVFKRISKR  |
| FABP2 | NYDKFMEKMG-VNVFELGVTFN | ELVQTYVYEGVEAKRIFKK  |
| FABP3 | NFDDYMKSLG-VGSFKLGVEFD | KLILTLTHGTAVCTRTYEK  |
| FABP4 | NFDDYMKEVG-VGSFILGQEFD | KLVEECVMKGVVTSTRVYER |
| FABP5 | GFDEYMKELG-VGSCTLGKFE  | KLVEECVMNNVTCTRIYEK  |
| FABP6 | NYDEFMKLLG-ISKFTVGKESN | KLVEVSTIGGVTYERVSKR  |
| FABP7 | NFDEYMKALG-VGSFQLGEEFD | KMVMTLTFGDVVAVRHYEK  |
| FABP8 | NFDDYMKALG-VGSFKLGQEFE | KMVAECKMKGVVCTRIYEK  |
| FABP9 | NFEDYMKELG-VNSFKLGEEFD | KMVVECKMNNIVSTRIYEK  |
| NOA1  | SHGHMITAVGGNGGYPGGKQFV | KLVDIVDFNGSFLARVRDL  |

**B**

|                            |                       |
|----------------------------|-----------------------|
| <i>Arabidopsis</i> , NOA1  | LSHGHMITAVGGNGGYPGGKQ |
| <i>A. lyrata</i>           | LSHGHMITAVGGNGGYSGGKQ |
| <i>Nicotiana attenuata</i> | LSHGHMITAVGGNGGYSGGKQ |
| <i>N. benthamiana</i>      | LSHGHMITAVGGNGGYSGGKQ |
| <i>Oryza sativa</i>        | LSHGHMITAVGGHGGYPGGKQ |
| <i>Solanum tuberosum</i>   | LSHGHMITAVGGNGGYSGGKQ |
| <i>Ricinis communis</i>    | LSHGHMITAVGGNGGYSGGKQ |
| <i>Populus trichocarpa</i> | LSHGHMITAVGGNGGYSGGKQ |
| <i>Hordeum vulgare</i>     | LSHGHMVTAVGGHGGYPGGKQ |
| <i>Vitis vinifera</i>      | LSHGQMITAVGGNGGYSGGKQ |
| <i>Zea mays</i>            | LSHGHMVTAVGGHGGYPGGK  |
| <i>Arabidopsis</i> , NOA1  | KLVDIVDFNGSFLARVRDL   |
| <i>Nicotiana attenuata</i> | KLVDIVDFNGSFLARVRDL   |
| <i>N. benthamiana</i>      | KLVDIVDFNGSFLARVRDL   |
| <i>Solanum tuberosum</i>   | KLVDIVDFNGSFLARVRDL   |
| <i>Brassica juncea</i>     | KLVDIVDFNGSFLARVRDL   |
| <i>Picea sitchensis</i>    | KLVDIVDFNGSFLARVRDL   |
| <i>Oryza sativa</i>        | KLVDIVDFNGSFLARVRD    |
| <i>Vitis vinifera</i>      | KLVDIVDFNGSFLAHVRDL   |
| <i>Hordeum vulgare</i>     | KLVDIVDFNGSFLARIRD    |
| <i>Medicago truncatula</i> | KLVDVDFNGSFLSRVRDL    |
| <i>Populus trichocarpa</i> | KLVDVDFNGSFLARLRDL    |

**Supplemental Figure 12. Fatty acid binding properties of NOA1.** (A) Amino acid alignment of conserved FA binding domains of mammalian FA binding proteins (FABP) and NOA1. The members of FABP family show 22-73% aa sequence similarity (Zimmerman and Veerkamp 2002). Identical residues are shaded in red. Residues common between NOA1 and most other FABPs are shaded in green. These domains in left and right panels represent aa 151-171 and 193-211 of NOA1 protein, respectively. Sequence alignment was carried out using ClustalW in the Megalign program of the DNASTAR package. (B) Amino acid alignment of putative FA binding domains of NOA1-like plant proteins.

Supplemental Figure 13

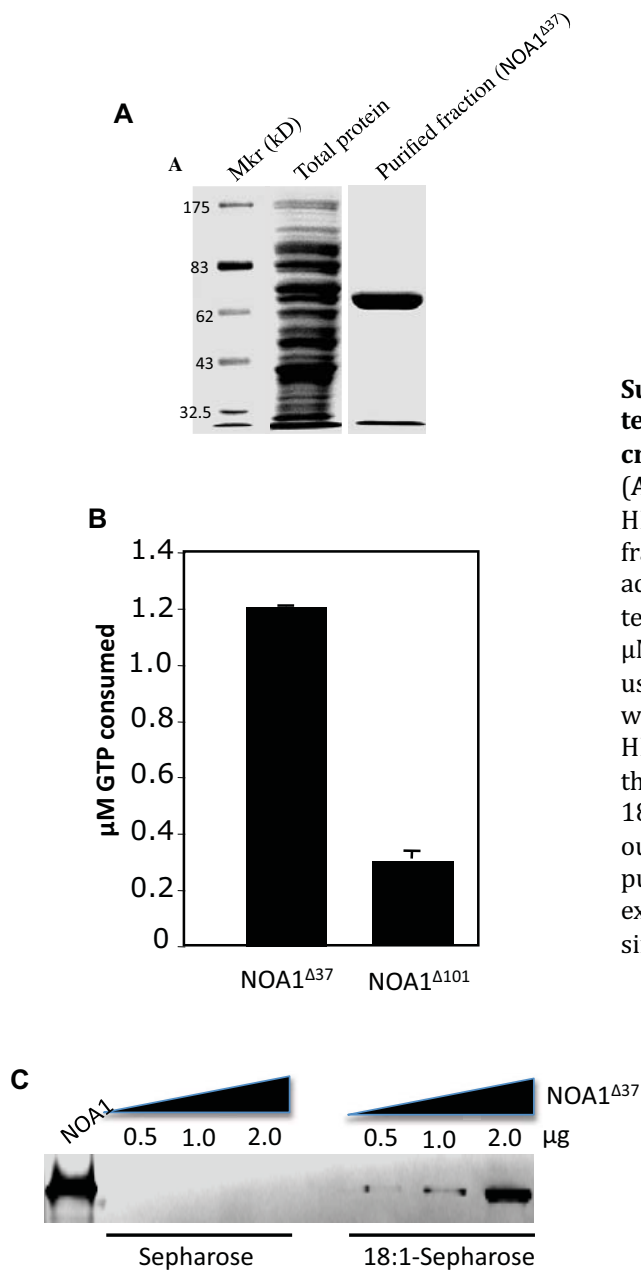

**Supplemental Figure 13. N-terminal 37-101 amino acids are critical for NOA1 GTPase activity.** (A) SDS-PAGE gel showing NOA1-HIS<sup>Δ37</sup> protein in total and purified fractions. (B) Comparison of GTPase activity of NOA1-HIS lacking N-terminal 37 or 101 amino acids. 100 μM GTP and 2 μM NOA1-HIS were used for the assay and levels of GDP were measured using reverse phase HPLC. The experiment was repeated three times with similar results. (C) 18:1 affinity chromatography carried out using 0.5, 1, or 2 μg of *E. coli* purified NOA1-HIS<sup>Δ37</sup> protein. The experiment was repeated twice with similar results.

## Supplemental Figure 14

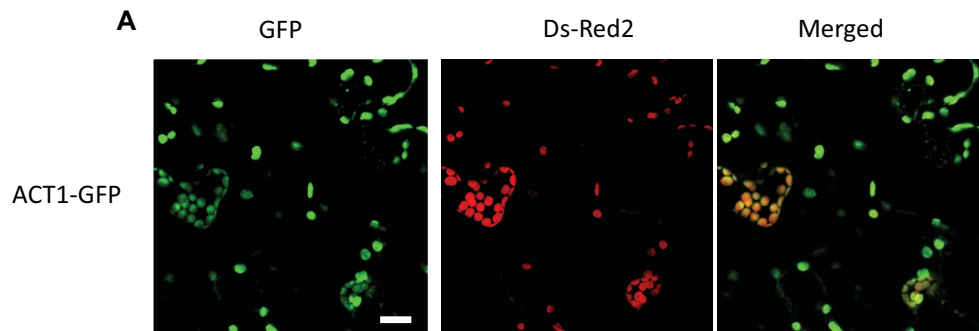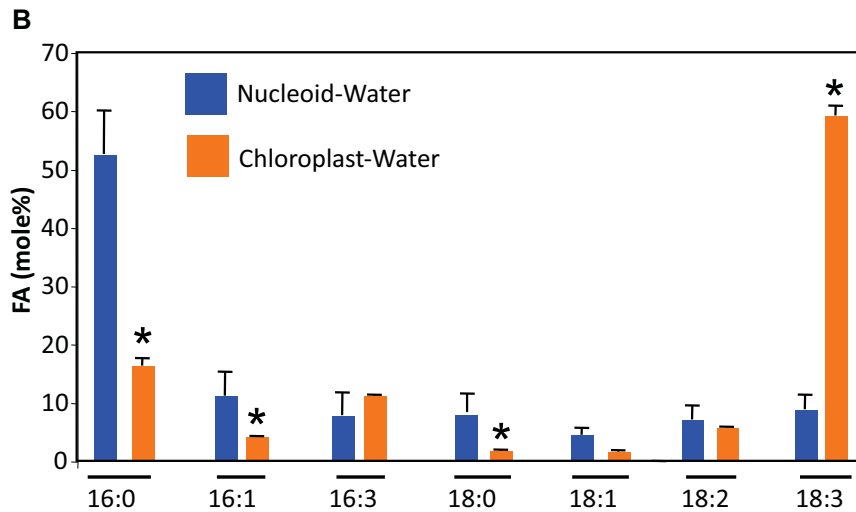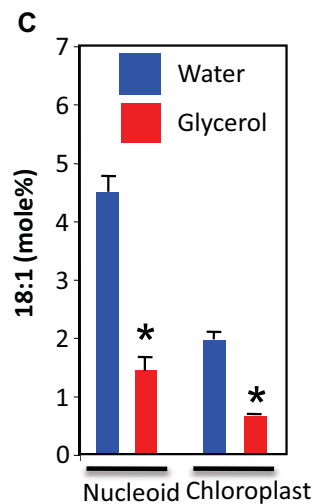

**Supplemental Figure 14. Localization of ACT1 and fatty acid analysis of nucleoids.** (A) Confocal micrograph showing localization of ACT1-GFP protein in *N. benthamiana*. Scale bar, 20  $\mu\text{m}$ . (B) Fatty acid profile of purified chloroplasts and the nucleoids, which were isolated from plants treated with water or glycerol. Error bars represent SD (n=6). Asterisks denote a significant difference between the FA species present in nucleoids versus chloroplasts (*t* test,  $P < 0.05$ ). The experiment was repeated twice with similar results. (C) 18:1 levels in purified nucleoid and the chloroplasts, isolated from wild-type (Col-0) plants treated with water or glycerol. Error bars represent SD (n=6). Asterisks denote a significant difference between water- and glycerol-treated samples (*t* test,  $P < 0.05$ ). The experiment was repeated twice with similar results.

Supplemental Figure 15

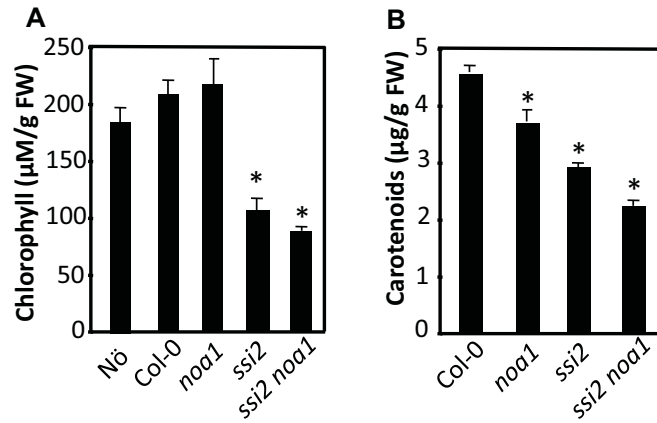

**Supplemental Figure 15. Levels of chlorophyll and carotenoids in *ssi2* plants. (A)** Levels of chlorophyll in four-week-old soil grown plants. Error bars indicate SD (n=4). Asterisks denote a significant difference with wild-type (*t* test,  $P < 0.05$ ). **(B)** Levels of carotenoids in four-week-old soil grown plants. Error bars indicate SD (n=4). Asterisks denote a significant difference with wild-type (*t* test,  $P < 0.05$ ).

Supplemental Figure 16

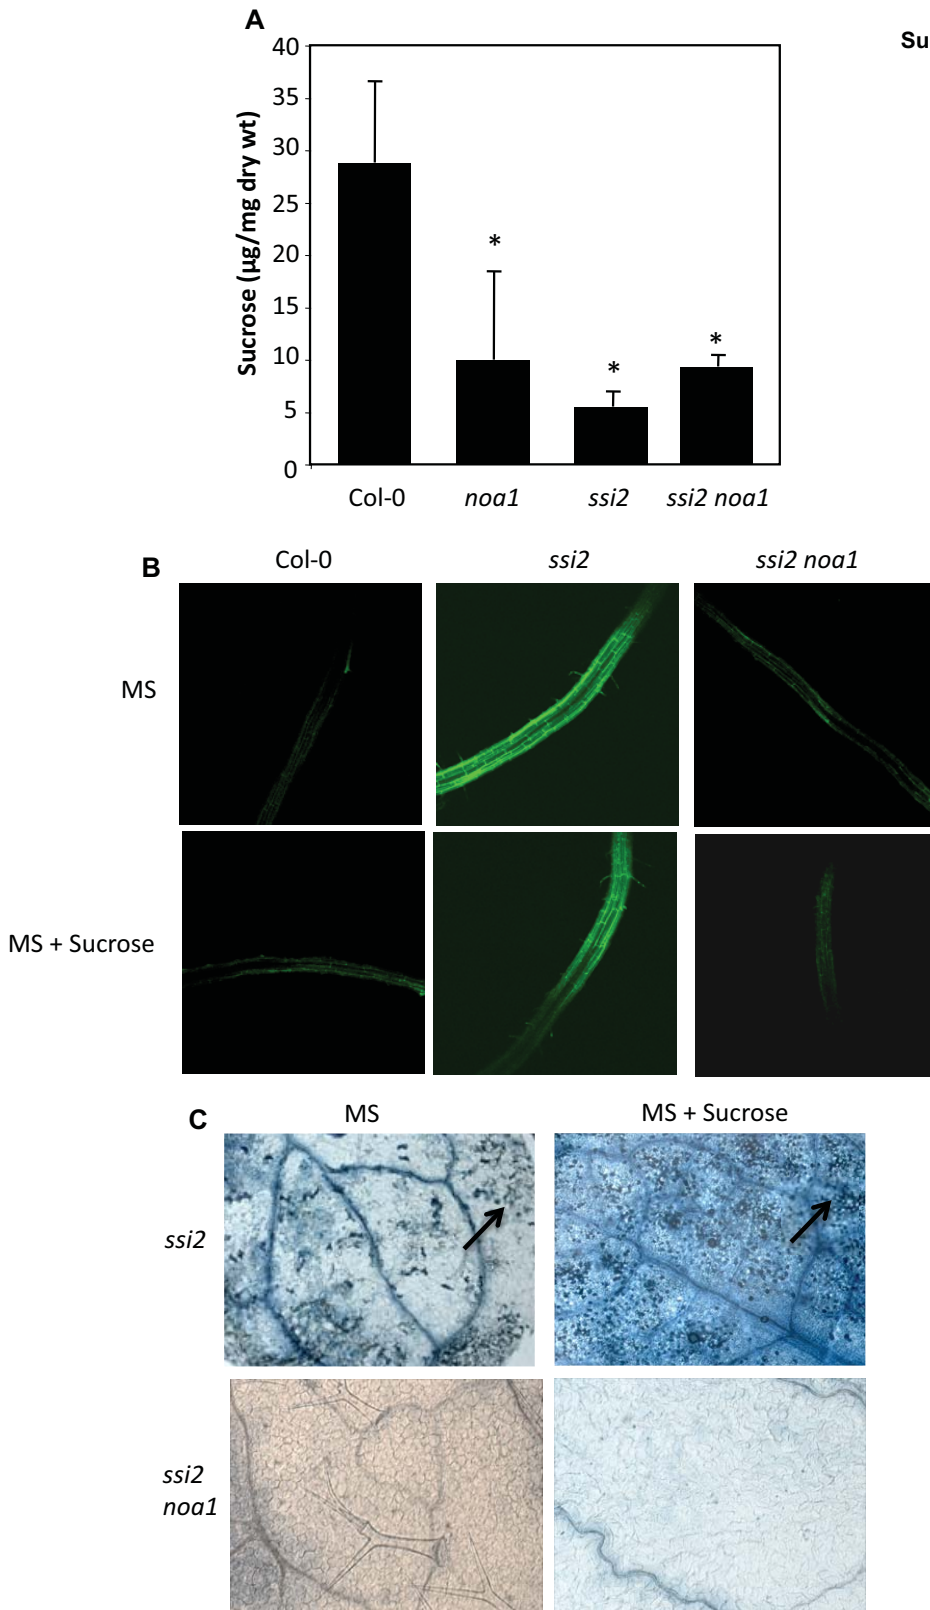

**Supplemental Figure 16. Sucrose grown *ssi2 noa1* plants show wt-like phenotypes.**

**(A)** Sucrose levels in wild-type (Col-0), *noa1*, *ssi2* and *ssi2 noa1* plants. Error bars represent SD (n=4). Asterisks denote a significant difference with wild-type (*t* test,  $P < 0.05$ , n=3). **(B)** Confocal micrgraph showing NO-sensitive fluorescent staining of roots. Ten-day-old seedlings were grown with or without sucrose (~20 each) and stained with DAF-FM DA for 15 min prior to microscopy. **(C)** Microscopy of trypan blue stained leaves obtained from seedling grown on MS medium with or without sucrose. Scale bar, 270 microns. Arrow indicates dead cells.

Supplemental Figure 17

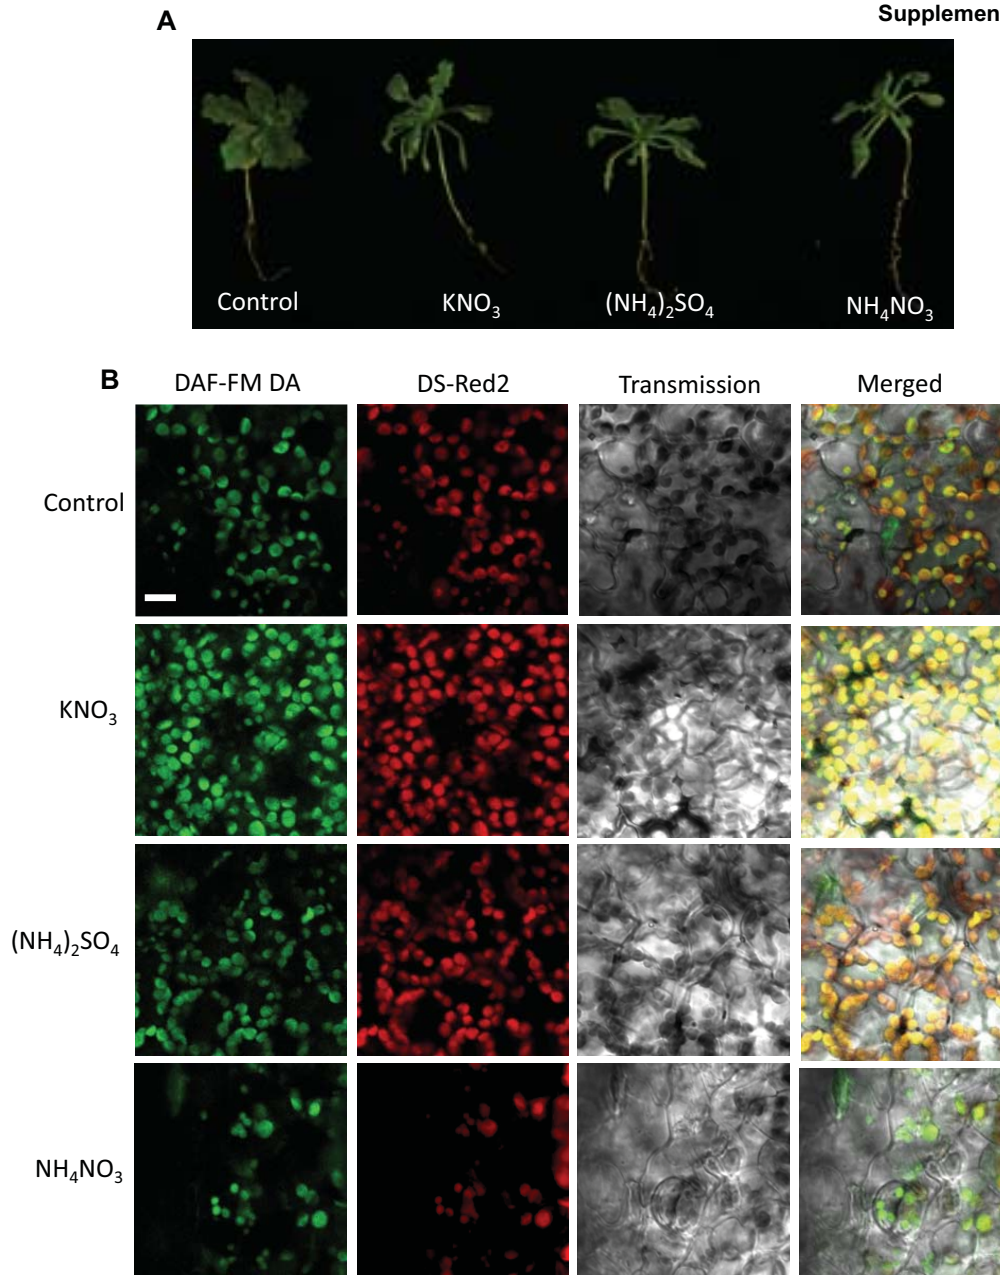

**Supplemental Figure 17. *ssi2* plants grown without nitrogen accumulate elevated NO.** (A) Typical morphological phenotypes of three-week-old *ssi2* plants grown on soil without external nitrogen source (control) or on soil containing 5 mM potassium nitrate, ammonium sulfate or ammonium nitrate. (B) Confocal micrograph of DAF-FM DA stained leaves showing relative NO levels in *ssi2* plants grown on soil without external nitrogen source (control) or containing potassium nitrate, ammonium sulfate or ammonium nitrate. Scale bar, 10  $\mu\text{m}$ . At least four independent leaves were analyzed in two experiments with similar results. Chloroplast autofluorescence (red) was visualized using Ds-Red2 channel.



**Supplemental Table 1.** Transcript levels of *NOA1*, *NIA1*, *NIA2* and *PR-1* in response to pathogen infections or exogenous application of SA. This data was obtained from the *Arabidopsis* gene expression browser ([www.expressionbrowser.com](http://www.expressionbrowser.com); Zhang et al., 2010<sup>a</sup>). T and C indicate treatment and control, respectively.

**Experiment: *Pseudomonas syringae* pv tomato avrRpm1 infiltration for 24 hr:** infiltrated with  $1 \times 10^8$  cfu/ml *Pseudomonas syringae* pv tomato avrRpm1, 2 leaves per plant, 8 plants pooled, harvested after 24h

| Name             | T    | C    | Fold Change | p-value |
|------------------|------|------|-------------|---------|
| AT2G14610 (PR-1) | 6739 | 660  | 10.19       | 0.0036  |
| AT1G77760 (NIA1) | 471  | 408  | 1.15        | 0.273   |
| AT1G37130 (NIA2) | 8336 | 4734 | 1.76        | 0.0123  |
| AT3G47450 (NOA1) | 130  | 253  | -1.94       | 0.0012  |

**Experiment: SA treatment, SA vs Control**

| Name             | T    | C    | Fold Change | p-value |
|------------------|------|------|-------------|---------|
| AT2G14610 (PR-1) | 3983 | 102  | 38.82       | 6.71E-5 |
| AT1G77760 (NIA1) | 8472 | 7695 | 1.1         | 0.4652  |
| AT1G37130 (NIA2) | 9797 | 9814 | -1.0        | 0.9713  |
| AT3G47450 (NOA1) | 187  | 282  | -1.5        | 0.0497  |

**Experiment: Pst DC3000 infection 24 hr:** Plants were inoculated by vacuum infiltration with *Pseudomonas syringae* pv. tomato strain DC3000 bacteria at a concentration of  $10 \times 10^6$  cfu/ml. Inoculated leaf tissue from at least 15 plants was collected for RNA isolation.

| Name             | T    | C    | Fold Change | p-value |
|------------------|------|------|-------------|---------|
| AT2G14610 (PR-1) | 954  | 374  | 2.55        | 0.5541  |
| AT1G77760 (NIA1) | 1229 | 86   | 14.25       | 0.0837  |
| AT1G37130 (NIA2) | 3699 | 3149 | 1.17        | 0.4509  |
| AT3G47450 (NOA1) | 72   | 105  | -1.44       | 0.2196  |

<sup>a</sup> Zhang M, Zhang Y, Liu L, Yu L, Tsang S, Tan J, Yao, W, Kang MS, An Y, Fan X. 2010. Gene Expression Browser: large-scale and cross-experiment microarray data integration, management, search & visualization. *BMC Bioinformatics* **11**: 433

**Supplemental Table 2.** Fold change in transcript levels of genes in *ssi2*, *ssi2 sid2*, *ssi2 act1* and *ssi2 eds1 sid2* plants compared to results from Col-0 (wild-type) plants. Genes showing 2-3, 3-4 and >4-fold activation are marked yellow, orange or red, respectively. Transcriptional profiling was performed using Affymetrix arrays.

|    | P Value  | Gene ID   | Gene Function                                               | <i>ssi2</i> <sup>a</sup> / Col-0 | <i>ssi2 sid2</i> <sup>b</sup> / Col-0 | <i>ssi2 act1</i> <sup>c</sup> / Col-0 | <i>ssi2 eds1 sid2</i> <sup>d</sup> / Col-0 |
|----|----------|-----------|-------------------------------------------------------------|----------------------------------|---------------------------------------|---------------------------------------|--------------------------------------------|
| 1  | 0.028    | AT5G60410 | Small Ubiquitin like modifier (SUMO) E3 ligase (AtSIZ1)     | 2.49                             | 1.52                                  | 1.52                                  | 0.61                                       |
| 2  | 0.00     | AT5G04140 | Ferredoxin-dependent glutamate synthase (Fd-GoGAT)          | 3.82                             | 7.55                                  | 7.55                                  | 2.03                                       |
| 3  | 0.01     | AT5G53460 | NADH-dependent glutamate synthase                           | 1.73                             | 1.32                                  | 1.32                                  | 0.56                                       |
| 4  | 4.36E-05 | AT5G56860 | GATA family Zn finger transcription factor                  | -2.22                            | 1.16                                  | 1.16                                  | 0.99                                       |
| 5  | 0.04     | AT1G12110 | NRT1.1 (Nitrate transporter)                                | -1.95                            | 1.53                                  | 1.53                                  | 0.47                                       |
| 6  | 0.00     | AT1G69850 | NRT1.2 (Inducible component of low-affinity nitrate uptake) | 3.36                             | 1.96                                  | 1.96                                  | 0.75                                       |
| 7  | 0.00     | AT1G32450 | NRT1.5 (involved in xylem transport of nitrate)             | 2.34                             | 2.11                                  | 2.11                                  | 0.5                                        |
| 8  | 4.95E-05 | AT4G13510 | Ammonium transport protein (AMT1)                           | 3.73                             | 1.94                                  | 1.94                                  | 0.89                                       |
| 9  | 0.00     | AT1G64780 | AMT1;2                                                      | 14.91                            | 76                                    | 1.55                                  | 3.03                                       |
| 10 | 0.00     | AT1G37130 | NIA2                                                        | 9.65                             | 8.27                                  | 1.2                                   | 10.04                                      |

<sup>a</sup> Low 18:1, constitutive defense, small morphology

<sup>b</sup> Low 18:1, constitutive defense, small morphology

<sup>c</sup> High 18:1, wild-type-like defense, wild-type-like morphology

<sup>d</sup> Low 18:1, wild-type-like defense, wild-type-like morphology



|                                                              |                                                                                |
|--------------------------------------------------------------|--------------------------------------------------------------------------------|
| 37)                                                          |                                                                                |
| NOA1- <i>E. coli</i> expression-NheI-XhoI linkered (del 101) | AGG GCT AGC GAT ACC TCA GTC TCA TGT TGT                                        |
| NIA1-localization-attBI                                      | AAAAAGCAGGCTTA ATGGCGACCTCCGTCGATAAC<br>AGAAAGCTGGGTA GAAGATTAAGAGATCCTCCTTCAC |
| NIA2-localization-attBI                                      | AAAAAGCAGGCTTA ATGGCGGCCTCTGTAGATAAT<br>AGAAAGCTGGGTA GAATATCAAGAAATCCTCCTTGAT |
| SSI2 localization-attBI                                      | AAAAAGCAGGCTTA ATGGCTCTAAAGTTTAACCC<br>AGAAAGCTGGGTA GAGCTGCACTTCTCTGT         |
| <i>β-tubulin</i>                                             | CGTGGATCACAGCAATACAGAGCC<br>CCTCCTGCACTTCCACTTCGTCTT                           |
| <i>RPS2</i>                                                  | TCTTATCGTTGGCTGTGCTCAGGT<br>ACGTATGGCCTTCAAGTCACCGAT                           |
| <i>RPP5</i>                                                  | AACAGACCGGCGAATTTGGAAAGG<br>TCTGTGAGAGCTTGCACCCATCTT                           |
| <i>SNC1</i>                                                  | AACAGACCGGCGAATTTGGAAAGG<br>GCAAGCTCTTCAATCATGGCTGCT                           |
| <i>RPS4</i>                                                  | GTTGGGATGCCCGGAATTGGTAAA<br>ACTTGGACAACCTCGCCTAAGAGCA                          |
| <i>RPM1</i>                                                  | TTGATGATGGCGATGCAAAGTGGG<br>TTCCCTTGGGTGCATCAATCCCTA                           |
| <i>RPP1</i>                                                  | GCCGAGATCATGAAATGCAGGCAA<br>GCGATTGTTGCCACATCCTCCAAA                           |
| <i>SSI4</i>                                                  | TCTTACGGGTGTTGCTGACCATGA<br>TGTAGCCTTTCTCGTATTGCGCCT                           |
| <i>Actin</i>                                                 | ACACTGTGCCAATCTACGAGGGTT<br>ACAATTTCCCGCTCTGCTGTTGTG                           |
